# Supplementary material for: The Burden of Cervical Conization in Privately Insured Young and Mid-Adult Women in the United States
Source: MDPI journal article supplement (doi:10.3390/vaccines11040804), 2023-04-05
Supplement: s1 [file s1]

## Supplementary Materials

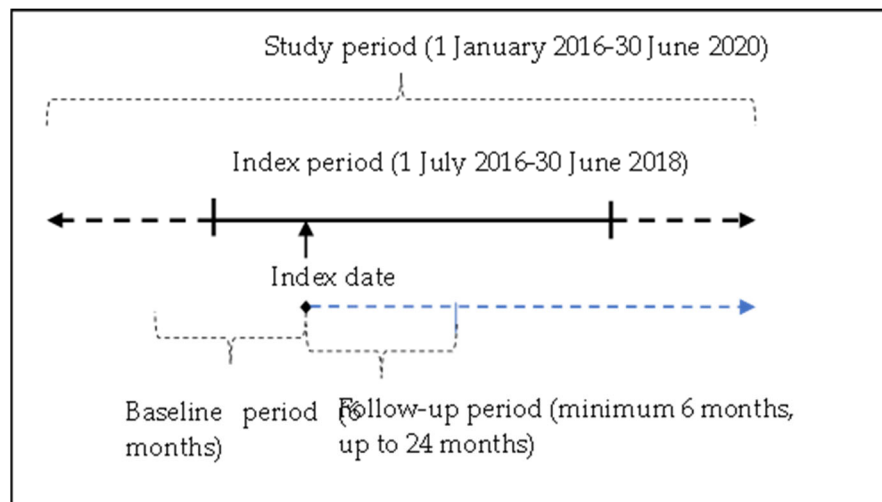

**Figure S1.** Study Design for estimating cost and HCRU of conization.

The figure uses a timeline diagram to describe the elements of the study design. The study period ranged from 01 January 2006 to 30 June 2020. The index period (patient identification period) ranges from 1 July 2016 to 30 June 2018. The index date was defined as the first evidence of conization within the study period. Patients were required to have a baseline period of 6 months and a follow-up period of up to 2 years with a minimum of 6 months requirement.

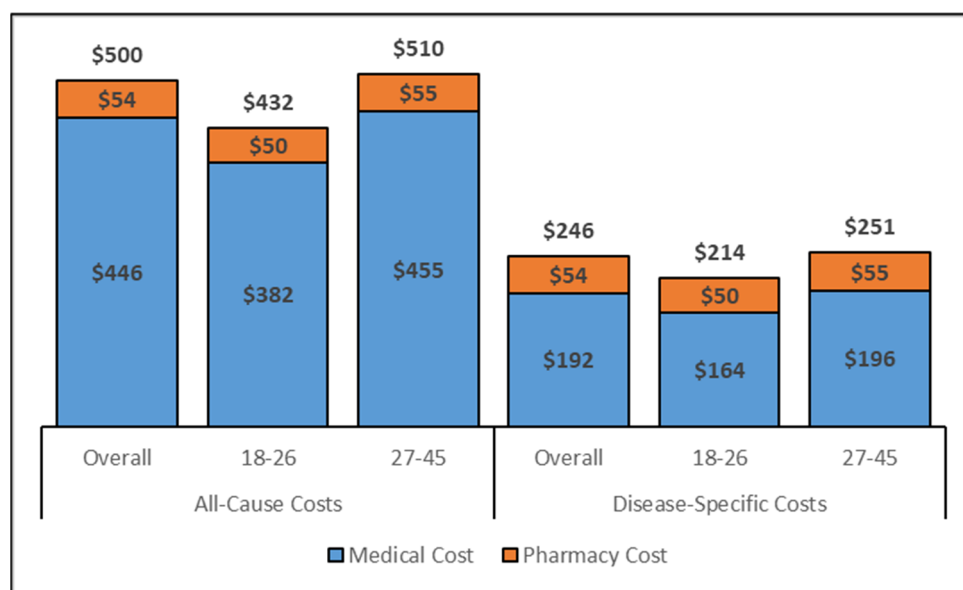

**Figure S2.** PPM costs for the overall cohort (Inflated to 2020 USD). Abbreviations: USD: United States Dollar. Note. The disease-specific pharmacy costs were estimated to be the same as the all-cause pharmacy costs, as there were no NDC codes to identify the disease-specific pharmacy utilization.

**Table S1.** Rate of repeat conization and CIN diagnosis in 6-months' follow-up period.

| Frequency                            | Overall Cohort (N=6,735) |
|--------------------------------------|--------------------------|
| <b>Rate of repeat Conization</b>     |                          |
| 0                                    | 6,427 (95.43)            |
| 1                                    | 301 (4.47)               |
| 2                                    | 6 (0.09)                 |
| 3                                    | 1 (0.01)                 |
| <b>Rate of repeat CIN diagnosis</b>  |                          |
| 0                                    | 4,745 (70.45)            |
| 1                                    | 1,480 (21.97)            |
| 2                                    | 329 (4.88)               |
| >=3                                  | 181 (2.7)                |
| <b>Rate of repeat CIN1 diagnosis</b> |                          |
| 0                                    | 6,361 (94.5)             |
| 1                                    | 331 (4.9)                |
| 2                                    | 36 (0.5)                 |
| >=3                                  | 7 (0.1)                  |
| <b>Rate of repeat CIN2 diagnosis</b> |                          |
| 0                                    | 5,874 (87.2)             |
| 1                                    | 713 (10.6)               |
| 2                                    | 109 (1.6)                |
| >=3                                  | 30 (0.6)                 |
| <b>Rate of repeat CIN3 diagnosis</b> |                          |
| 0                                    | 5,703 (84.7)             |
| 1                                    | 728 (10.8)               |
| 2                                    | 183 (2.7)                |
| >=3                                  | 73 (1.8)                 |

**Table S2.** HCRUs in complete/6 months' time period.

| HCRU                                      | Overall Cohort - Mean (SD) |                  | 18–26 age-group - Mean (SD) |                  | 18–26 age-group - Mean (SD) |                  |
|-------------------------------------------|----------------------------|------------------|-----------------------------|------------------|-----------------------------|------------------|
|                                           | All-cause                  | Disease Specific | All-cause                   | Disease Specific | All-cause                   | Disease Specific |
| <b>PPPY HCRUs in complete time period</b> |                            |                  |                             |                  |                             |                  |
| ER Visits                                 | 0.23 (0.72)                | 0.02 (0.17)      | 0.30 (0.80)                 | 0.03 (0.21)      | 0.22 (0.71)                 | 0.02 (0.16)      |
| Hospice Visits                            | 0.00 (0.07)                | 0.00 (0.01)      | 0.00 (0.00)                 | 0.00 (0.00)      | 0.00 (0.08)                 | 0.00 (0.01)      |
| Outpatient Visits                         | 5.01 (4.25)                | 1.29 (1.40)      | 5.02 (4.07)                 | 1.43 (1.42)      | 5.01 (4.28)                 | 1.27 (1.40)      |
| Physician Visits                          | 2.74 (4.79)                | 0.61 (0.83)      | 2.44 (3.84)                 | 0.68 (0.90)      | 2.78 (4.92)                 | 0.59 (0.82)      |
| Other Visits                              | 2.23 (2.93)                | 0.89 (1.17)      | 2.37 (2.89)                 | 1.05 (1.24)      | 2.37 (2.89)                 | 0.87 (1.15)      |
| Pharmacy Visits                           | 6.45 (7.51)                | 6.45 (7.51)      | 6.86 (7.19)                 | 6.86 (7.19)      | 6.38 (7.56)                 | 6.38 (7.56)      |
| <b>HCRUs in 6-months' time period</b>     |                            |                  |                             |                  |                             |                  |
| ER Visits                                 | 0.18 (0.63)                | 0.02 (0.18)      | 0.20 (0.68)                 | 0.03 (0.22)      | 0.17 (0.62)                 | 0.02 (0.17)      |
| Hospice Visits                            | 0.00 (0.09)                | 0.00 (0.01)      | 0.00 (0.00)                 | 0.00 (0.00)      | 0.00 (0.09)                 | 0.00 (0.01)      |
| Outpatient Visits                         | 3.73 (3.11)                | 1.30 (1.36)      | 3.51 (2.72)                 | 1.30 (1.26)      | 3.77 (3.17)                 | 1.30 (1.37)      |
| Physician Visits                          | 1.94 (3.18)                | 0.55 (0.78)      | 1.73 (2.79)                 | 0.59 (0.76)      | 1.97 (3.24)                 | 0.55 (0.79)      |

|                        |             |             |             |             |             |             |
|------------------------|-------------|-------------|-------------|-------------|-------------|-------------|
| <b>Other Visits</b>    | 1.67 (2.38) | 0.73 (1.12) | 1.68 (2.08) | 0.83 (1.18) | 1.67 (2.42) | 0.71 (1.11) |
| <b>Pharmacy Visits</b> | 4.27 (4.65) | 4.27 (4.65) | 4.41 (4.40) | 4.41 (4.40) | 4.25 (4.69) | 4.25 (4.69) |

Abbreviations: HCRU: Healthcare Resource Utilization. SD: standard deviation. ER: Emergency Room. PPPY: Per patient per year. The table represents the mean utilization of the following components of healthcare resources: Emergency room visits, Hospice visits, Outpatient visits, physician visits, pharmacy visits, and other visits for the study sample in the 2 years following index conization (represented as PPPY utilization) and the 6 months following index conization.

**Table S3.** ICD-10 diagnosis codes for pregnancy, delivery.

| ICD-10  | Description                         |
|---------|-------------------------------------|
| O60-O77 | Complications of labor and delivery |
| O80-O82 | Encounter for delivery              |
| O60-O77 | Complications of labor and delivery |
| O00-O09 | Pregnancy with abortive outcome     |

**Table S4.** ICD-10-PCS and CPT4 procedure codes for cervical conization:.

| Description                                           | CPT4  | ICD-10-PCS |
|-------------------------------------------------------|-------|------------|
| Cold Knife Cervical Conization                        | 57520 |            |
| Loop Excision Cervical Conization                     | 57522 |            |
| Excision of Cervix, Via Natural or Artificial Opening |       | 0UBC7ZZ    |

**Table S5.** CPT//ICD-10-CM Codes for Post-Operative Complication/Adverse Event/Secondary Procedures after conization.

| Post-Operative Complication / Adverse Event   | ICD-10-CMS            |
|-----------------------------------------------|-----------------------|
| Hemorrhage                                    | R58                   |
| Vaginal bleeding                              | N93.8                 |
| Vaginal Discharge                             | N89.8                 |
| Febrile body temperature/ Fever               | R50.9                 |
| Pain                                          |                       |
| Mild cramping and discomfort (abdominal pain) | R10.10, R10.2, R10.30 |
| Scarring of the cervix                        | N88.1                 |
| Menstrual-like cramps (Dysmenorrhea)          | N94.6                 |
|                                               | N87.0                 |
| CIN1/2/3                                      | N87.1                 |
|                                               | D06.0                 |

D06.0  
D06.1  
D06.7

Abnormal Pap

R87610-R87619

**Secondary Procedures after  
conization**

**ICD-10 PCS/ CPT Codes**

Conization (CKC/LEEP)

0UBC7ZZ

Other Procedures on the cervix  
(Includes Pap test, Biopsy of cervix,  
Electrocautery of cervix,  
Thermal cautery of cervix,  
Cryocautery of cervix,  
Laser ablation of cervix,  
Conization of cervix using cold  
knife,  
Excision of cervix using loop  
electrode,  
Amputation of cervix, Colposcopy,  
Cerclage of uterine cervix,  
Plastic repair of uterine cervix by  
vaginal approach)

57510, 57511, 57513 Other surgical cautery of cervix  
57530-57531 Trachelectomy (amputation of cervix) 57540, 57545, 57550,  
57555, 57556 Excision of cervical stump

Hysterectomy

51925, 56308, 58150, 58152, 58200, 58210, 58240, 58260, 58262, 58263, 58267,  
58270, 58275, 58280, 58285, 58290-58294, 59525, 58548, 58550, 58552- 58554,  
58570-58573, 58951, 58953, 58954, 58956, 59135

Pap test

•88175  
•Z01.42 (ICD-10)  
•88141, 88142, 88143, 88147, 88147, 88150, 88152, 88153, 88154, 88164, 88165,  
88166, 88167, 88174, 88175  
•G0123, G0124,  
G0141, G0143, G0144, G0145, G0147, G0148, P3000, P3001, Q0091

HPV test

•87623  
•87624  
•87625  
•87620, 87621, 87622

Colposcopy

•57420  
•57421  
•57452  
•57454  
•57455

- 57456
- 57460
- 57461

**Table S6.** ICD-9-CM/ICD-10-CM Codes for Comorbidities.

| Comorbidities   | ICD 9-CM | ICD 10                                                                                                                                                                                                                                                                                                             |
|-----------------|----------|--------------------------------------------------------------------------------------------------------------------------------------------------------------------------------------------------------------------------------------------------------------------------------------------------------------------|
| CIN 1           | • 622.11 | • N87.0                                                                                                                                                                                                                                                                                                            |
| CIN 2           | • 622.12 | • N87.1                                                                                                                                                                                                                                                                                                            |
| CIN 3           | • 233.1  | <ul style="list-style-type: none"> <li>• D06.0 Carcinoma in situ of cervix uteri</li> <li>• D06.0 Carcinoma in situ of endocervix</li> <li>• D06.1 Carcinoma in situ of exocervix</li> <li>• D06.7 Carcinoma in situ of other parts of cervix</li> <li>• D06.9 Carcinoma in situ of cervix, unspecified</li> </ul> |
| HPV infection   | • 795.05 | • R87.810                                                                                                                                                                                                                                                                                                          |
| Cervical Cancer | • 180.9  | • C53.9                                                                                                                                                                                                                                                                                                            |

**Table S7.** CPT/ICD procedure codes for Laboratory Tests.

| Test       | Description                                                                                                        | CPT/ICD                                                                                                                                                                                                                                                                                             |
|------------|--------------------------------------------------------------------------------------------------------------------|-----------------------------------------------------------------------------------------------------------------------------------------------------------------------------------------------------------------------------------------------------------------------------------------------------|
| HPV        | •Low risk types (eg, 6, 11, 42, 43, 44)                                                                            | •87623                                                                                                                                                                                                                                                                                              |
|            | •high-risk types (eg, 16, 18, 31, 33, 35, 39, 45, 51, 52, 56, 58, 59, 68)                                          | •87624                                                                                                                                                                                                                                                                                              |
|            | •Types 16 and 18 only, includes type 45, if performed                                                              | •87625                                                                                                                                                                                                                                                                                              |
|            | •HPV Test                                                                                                          | •87620, 87621, 87622                                                                                                                                                                                                                                                                                |
| Pap test   | •Cervical Cytology                                                                                                 | •88175                                                                                                                                                                                                                                                                                              |
|            |                                                                                                                    | <ul style="list-style-type: none"> <li>•V72.32 (ICD-9)</li> <li>•Z01.42 (ICD-10)</li> <li>•88141, 88142, 88143, 88147, 88147, 88150, 88152, 88153, 88154, 88164, 88165, 88166, 88167, 88174, 88175</li> <li>•G0123, G0124, G0141, G0143, G0144, G0145, G0147, G0148, P3000, P3001, Q0091</li> </ul> |
| Colposcopy | •Colposcopy of the entire vagina, with cervix if present                                                           | •57420                                                                                                                                                                                                                                                                                              |
|            | •Colposcopy of the entire vagina, with cervix if present; with biopsy(s)                                           | •57421                                                                                                                                                                                                                                                                                              |
|            | •Colposcopy of the cervix including upper/adjacent vagina                                                          | •57452                                                                                                                                                                                                                                                                                              |
|            | •Colposcopy of the cervix including upper/adjacent vagina; with biopsy(s) of the cervix and endocervical curettage | •57454                                                                                                                                                                                                                                                                                              |
|            | •Colposcopy of the cervix including upper/adjacent vagina; with biopsy(s) of the cervix                            | •57455                                                                                                                                                                                                                                                                                              |
|            | •Colposcopy of the cervix including upper/adjacent vagina; with endocervical curettage                             | •57456                                                                                                                                                                                                                                                                                              |

|                                                                                                            |                     |
|------------------------------------------------------------------------------------------------------------|---------------------|
| •Colposcopy of the cervix including upper/adjacent vagina;<br>with loop electrode biopsy(s) of the cervix  | •57460              |
| •Colposcopy of the cervix including upper/adjacent vagina;<br>with loop electrode conization of the cervix | •57461              |
| •Vaginosis                                                                                                 | •70.12 (ICD-9 proc) |

**Table S8.** CPT 4 Procedure codes for HPV vaccine.

| Vaccine    | CPT4  |
|------------|-------|
| GARDASIL   | 90649 |
| CERVARIX   | 90650 |
| GARDASIL 9 | 90651 |

**Table 9.** ICD-9-CM/ICD-10-CM Codes for Exclusion criteria: All Cancers / HIV / Immunosuppressive conditions.

| Description                                                                | ICD- 9 Code                                                                                                                                                             | ICD-10 Code                                                                                                                          |                                                                                                                                                                                                                                 |                                                                                              |
|----------------------------------------------------------------------------|-------------------------------------------------------------------------------------------------------------------------------------------------------------------------|--------------------------------------------------------------------------------------------------------------------------------------|---------------------------------------------------------------------------------------------------------------------------------------------------------------------------------------------------------------------------------|----------------------------------------------------------------------------------------------|
| Human immunodeficiency virus (HIV)                                         | 042, V08, 079.53                                                                                                                                                        | B20-B24, Z21, B97.35                                                                                                                 |                                                                                                                                                                                                                                 |                                                                                              |
| Cancer                                                                     | 140-209, 230-234                                                                                                                                                        | C00-C95, C7A D00-D09                                                                                                                 |                                                                                                                                                                                                                                 |                                                                                              |
| Hematologic malignancy (HM)                                                | 200.xx-208.92 238.4x, 238.6x                                                                                                                                            | D49.4 D47.Z9                                                                                                                         |                                                                                                                                                                                                                                 |                                                                                              |
| Disorders involving the immune mechanism                                   | 279.xx                                                                                                                                                                  | D80-D89                                                                                                                              |                                                                                                                                                                                                                                 |                                                                                              |
| Aplastic anemia and other bone marrow failure syndromes                    | 284.xx                                                                                                                                                                  | D61.810, D61.811, D61.818 D61.82                                                                                                     |                                                                                                                                                                                                                                 |                                                                                              |
| Procedures                                                                 | ICD-9 dx/proc                                                                                                                                                           | ICD-10 dx/proc                                                                                                                       | CPT                                                                                                                                                                                                                             | HCPCS                                                                                        |
| Organ transplantation (including hematopoietic stem cell transplant (HCT)) | 199.2x, 238.77, 414.06, 414.07, 996.8x, E878.0, V42.xx, V45.87, V58.44, 00.91-00.93, 07.94, 11.60, 11.69, 33.50-33.6x, 37.51, 41.0x, 46.97, 50.4x, 50.5x, 52.80, 52.83, | C80.2, D47.Z1, I25.811, I25.812, T86.9x, T86.1x, T86.4x, T86.2x, T86.8x, T86.0x, T86.5x Y83.0, Z94.xx, Z95.3 Z98.85 Z48.298, 0xYxxxx | 00144, 00580, 00796, 00868, 29868, 32851-32856, 33933-33935, 33944-33945, 38240, 38241, 38242, 44135-44137, 44715-44721, 47135-47136, 47143-47147, 48551-48556, 50323-50370, 65710-65757, 65780-65781, 76776-76778, 81267-81268 | G0341-G0343, G0369, Q0510, S2052-S2054, S2060, S2065, S2102-S2103, S2109, S2142-S2152, S9085 |

|                                                                                            |                                                                                                      |                                                                                                             |                                                                                                                                                                                                                                                                                                                                                                                                                                                                                                                                                                                                                                                                                      |                                                                                                                                                                                                                                    |
|--------------------------------------------------------------------------------------------|------------------------------------------------------------------------------------------------------|-------------------------------------------------------------------------------------------------------------|--------------------------------------------------------------------------------------------------------------------------------------------------------------------------------------------------------------------------------------------------------------------------------------------------------------------------------------------------------------------------------------------------------------------------------------------------------------------------------------------------------------------------------------------------------------------------------------------------------------------------------------------------------------------------------------|------------------------------------------------------------------------------------------------------------------------------------------------------------------------------------------------------------------------------------|
|                                                                                            | 52.85, 52.86, 55.53,<br>55.69                                                                        |                                                                                                             |                                                                                                                                                                                                                                                                                                                                                                                                                                                                                                                                                                                                                                                                                      |                                                                                                                                                                                                                                    |
| Procedures indicating:<br>Injection or infusion of<br>cancer chemotherapeutic<br>substance | 528.01,<br>960.7x,<br>963.1x,<br>999.81,<br>E930.7,<br>E933.1,<br>V58.11,<br>V66.2x,<br>V67.2x       | K12.31, K12.33<br>T45.1X1A<br>T451X1A, T451X2A,<br>T451X3A, T451X4A,<br>T80810A, Z5111<br>Z5189<br>Z08, Z09 | 36260, 36640, 96401,<br>96402, 96409, 96411,<br>96413, 96415, 96416,<br>96417, 96420, 96422,<br>96423, 96425, 96440,<br>96445, 96549                                                                                                                                                                                                                                                                                                                                                                                                                                                                                                                                                 | C8953-C8955,<br>S9329- S9331,<br>Q0083, Q0084,<br>Q0085, S1016                                                                                                                                                                     |
| Procedures indicating:<br>Radiation therapy                                                | V58.0x,<br>V66.1x,<br>V67.1x,<br>17.61, 92.2x, 92.30,<br>92.31, 92.32, 92.33,<br>92.39, 92.41, 99.85 | Z510, Z5189, Z08,<br>Z09, Dxxxxxx                                                                           | 32998, 50559, 50578,<br>50959, 50978, 52250,<br>58346, 61796, 61797,<br>61798, 61799, 63620,<br>63621, 77371, 77372,<br>77373, 77380, 77381,<br>77401, 77402, 77403,<br>77404, 77406, 77407,<br>77408, 77409, 77411,<br>77412, 77413, 77414,<br>77416, 77418, 77422,<br>77423, 77424, 77425,<br>77427, 77431, 77432,<br>77435, 77469, 77470,<br>77499, 77520, 77522,<br>77523, 77525, 77600,<br>77605, 77610, 77615,<br>77620, 77750, 77761,<br>77762, 77763, 77776,<br>77777, 77778, 77781,<br>77782, 77783, 77784,<br>77785, 77786, 77787,<br>77789, 79005, 79030,<br>79035, 79100, 79101,<br>79200, 79300, 79400,<br>79403, 79420, 79440,<br>79445, 79999, 0082T,<br>0083T, 0182T | A9523, A9534,<br>A9699, C1081,<br>C1083, C1715,<br>C1716, C1717,<br>C1718, C1719,<br>C1720, C2616,<br>C2633, C2634,<br>C2635, C2636,<br>C9401, C9402,<br>C9405, G0173,<br>G0242, G0243,<br>G0251, G0339,<br>G0340, Q3001,<br>S8049 |

**Table S10.** Drugs for Immunosuppressive conditions.

Treatment with:

- Chemotherapy
- Radiation therapy
- TNF inhibitors
- Protease inhibitors
- Reverse transcriptase inhibitors
- Azathioprine, cyclosporine, or tacrolimus

| Drug Name              | HCPCS                            |
|------------------------|----------------------------------|
| Abatacept              | J0129                            |
| Adalimumab             | J0135                            |
| Aldesleukin            | J9015                            |
| Alemtuzumab            | J9010                            |
| Alimta (LY231514)      |                                  |
| Altretamine            |                                  |
| Aminoglutethimide      |                                  |
| Anakinra               |                                  |
| Antithymocyte Globulin | J7504                            |
| Arsenic trioxide       | J9017                            |
| Asparaginase           | J9020                            |
| Auranofin              |                                  |
| Azacitidine            | J9025                            |
| Azathioprine           | J7500, J7501                     |
| Basiliximab            | J0480                            |
| BCG live vaccine       | J9031                            |
| Bexarotene             |                                  |
| Bleomycin              | J9040                            |
| Bortezomib             | J9041                            |
| Busulfan               | J0594, J8510                     |
| Capecitabine           | J8520, J8521                     |
| Carboplatin            | J9045                            |
| Carmustine             | J9050                            |
| Chlorambucil           | J0720, S0172                     |
| Chromic or Na P-32     |                                  |
| Cisplatin              | C9418, J9060, J9062              |
| Cladribine             | J9065                            |
| Clofarabine            | J9027                            |
| Cyclophosphamide       | J8530, J9070, J9080, J9090-J9097 |
| Cyclosporin            | J7502, J7515, J7516              |
| Cytarabine             | J9098, J9100, J9110              |
| Dacarbazine            | J9130, J9140                     |
| Daclizumab             | J7513                            |
| Dactinomycin           | J9120                            |
| Dasatinib              |                                  |



|                       |                                          |
|-----------------------|------------------------------------------|
| Daunorubicin          | J9150, J9151                             |
| Decitabine            | J0894                                    |
| Denileukin deftitox   | J9160                                    |
| Docetaxol             | J9170, J9171                             |
| Doxorubicin           | J9000, J9001, J9010, C9415, Q2048, Q2049 |
| Eculizumab            | J1300                                    |
| Epirubicin            | J9178                                    |
| Estramustine          |                                          |
| Etanercept            | J1438                                    |
| Etoposide             | J8560, J9181, J9182, C9414, C9425        |
| Floxuridine           | J9200                                    |
| Fludarabine           | C9262, J8562, J0185, Q2025               |
| Fluorouracil          | J9190, S3722                             |
| GCSF (as a proxy)     | J8560, J9181, J9182, C9414, C9425        |
| Gemcitabine           | J9201                                    |
| Gemtuzumab            | J9300                                    |
| Hexamethylmelamine    |                                          |
| Hydroxyurea           | S0176                                    |
| Ibritumomab Tiuxetan  | A9543                                    |
| Idarubicin            | J9211                                    |
| Ifosfamide/mesna      | C9427, J9208                             |
| Imatinib Mesylate     | S0088                                    |
| Infliximab            | J1745                                    |
| Interferon alfa-2A    | J9213, S0145                             |
| Interferon alfa-2B    | J9214, S0146, S0148                      |
| Interferon alfa-N3    |                                          |
| Interferon beta-1A    |                                          |
| Interferon beta-1B    |                                          |
| Interferon gamma-1B   |                                          |
| Irinotecan            | J9206                                    |
| Ixabepilone           | C9240, J9207                             |
| Leflunomide           |                                          |
| Lenalidomide          |                                          |
| Lomustine             | S0178                                    |
| MAB-B43.13            |                                          |
| Mechlorethamine       | J9230                                    |
| Melphalan             | J9245, J8600                             |
| Mercaptopurine        | S0108                                    |
| Methotrexate          | J9250, J9260, J8610                      |
| Mitomycin             |                                          |
| Mitoxantrone          | J9293                                    |
| Muromonab-CD3         | J7505                                    |
| Mycophenolate mofetil | J7517                                    |
| Nelarabine            | J9261                                    |

|                       |                      |
|-----------------------|----------------------|
| Nilotinib             |                      |
| Nitrogen Mustard      |                      |
| Oxaliplatin           | J9263, C9205         |
| Paclitaxel            | J9264, J9265, C9431  |
| Panitumumab           | J9303                |
| Pegaspargase          | J9266                |
| Peginterferon alfa-2A | J9213, S0145         |
| Peginterferon alfa-2B | J9214, S0146, S0148  |
| Pemetrexed disodium   | C9213, J9305         |
| Penicillamine         |                      |
| Pentostatin           | J9268                |
| Pipobroman            |                      |
| Procarbazine          | S0182                |
| Rituximab             | J9310                |
| Sirolimus             | J7520                |
| Streptozocin          | J9320                |
| Tacrolimus            | J7507, J7525         |
| Temozolomide          | C9253, J8700, J9328  |
| Temsirolomus          | C9239, J9330         |
| Teniposide            | Q2017                |
| Thalidomide           |                      |
| Thioguanine           |                      |
| Thiotepa              | J9340                |
| TLK286                |                      |
| Topotecan             | J8705, J9350, J9351, |
| Tositumomab           | A9545, G3001         |
| Tretinoin             | S0117                |
| Trimetrexate          | J3305                |
| Vinblastine           | J9360                |
| Vincristine           | J9370, J9375, J9380  |
| Vinorelbine           | J9390                |

○ Systemic Corticosteroids

|                    |                        |
|--------------------|------------------------|
| <b>Prednisone</b>  | <b>&gt; 7.5 mg/day</b> |
| prednisolone       | > 7.5 mg/day           |
| Hydrocortisone     | > 30 mg/day            |
| Methylprednisolone | > 6 mg/day             |
| Dexamethazone      | > 1.125 mg/day         |
